# Supplementary material for: Aberrant Splicing Promotes Proteasomal Degradation of L-type CaV1.2 Calcium Channels by Competitive Binding for CaVβ Subunits in Cardiac Hypertrophy
Source: PubMed Central journal article supplement (PMC5059693; doi:10.1038/srep35247), 2016-10-12
Supplement: srep35247-s1.pdf [file srep35247-s1.pdf]

## Supplementary Information

### Aberrant Splicing Promotes Proteasomal Degradation of L-type $Ca_v1.2$ Calcium Channels by Competitive Binding for $Ca_v\beta$ Subunits in Cardiac Hypertrophy

Zhenyu Hu, Jiong-Wei Wang, Dejie Yu, Jia Lin Soon, Dominique PV de Kleijn, Roger Foo, Ping Liao, Henry M. Colecraft, Tuck Wah Soong

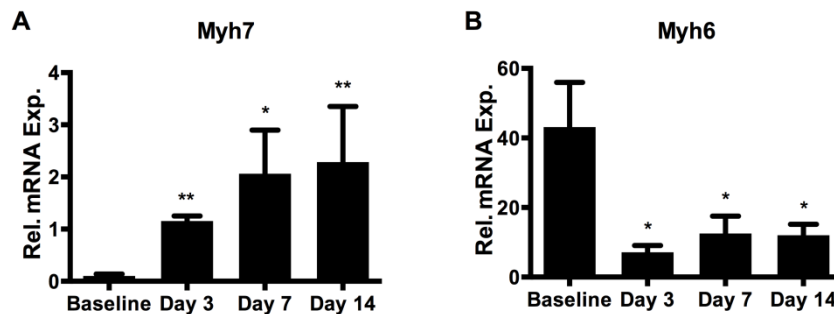

**Figure S1. Expression of hypertrophic genes in the mouse hearts in response to TAC.** Relative expression of mRNA to 18s RNA (internal control) was quantified by qPCR with mouse left ventricle lysates at indicated time after TAC surgery. The increase in Myh7 and decrease in Myh6 indicate cardiac hypertrophy. The number of animals examined: Baseline n=6, Day 3 n=4, Day 7 n=5 and Day 14 n=6. Data were shown as mean  $\pm$  SEM. Compared with baseline group, \* $p$ <0.05, \*\* $p$ <0.01.

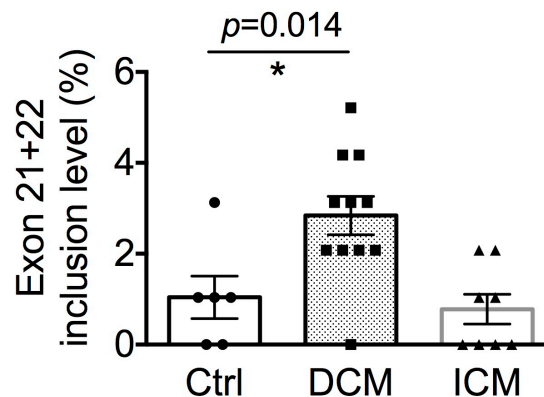

**Figure S2. Exons 21+22 inclusion level in left ventricles of human patients with or without dilated or ischemic cardiomyopathy.** Inclusion level of exons 21+22 was significantly higher in heart tissues from patients with dilated cardiomyopathy (DCM, 2.84%) than that in control heart tissue (1.04%). No elevation of inclusion level of exons 21+22 was observed in heart samples from patients with ischemic cardiomyopathy (ICM, 0.78%). The number of human samples examined: Ctrl, n=6; DCM, n=11; ICM, n=8. Data were shown as mean  $\pm$  SEM. Compared with Ctrl group, \* $p$ <0.05.

**Table S1. Patient characteristics for human heart samples**

| Group   | Sample code | Age         | Sex                          | Date Taken | Diagnosis summary                                                                                                                                                                                                                                       | Pre-op medications                                                                                    |
|---------|-------------|-------------|------------------------------|------------|---------------------------------------------------------------------------------------------------------------------------------------------------------------------------------------------------------------------------------------------------------|-------------------------------------------------------------------------------------------------------|
| Control | 2634        | 53          | M                            |            | SAH                                                                                                                                                                                                                                                     |                                                                                                       |
|         | 2824        | 48          | M                            |            | ICB                                                                                                                                                                                                                                                     |                                                                                                       |
|         | 2871        | NA          | NA                           |            |                                                                                                                                                                                                                                                         |                                                                                                       |
|         | 3074        | 47          | M                            |            | Intraventricular haemorrhage                                                                                                                                                                                                                            |                                                                                                       |
|         | 7454        | NA          | NA                           |            |                                                                                                                                                                                                                                                         |                                                                                                       |
|         | Clontech    | Cat# 636532 | Normal human heart total RNA |            |                                                                                                                                                                                                                                                         |                                                                                                       |
| DCM     | TB12.0122   | 61          | M                            | 26/01/2012 | Non-ischemic cardiomyopathy - diagnosed 1997 (with LV Thrombus) Non sustained VT, ICD implant 1999, Upgrade to CRTD 2002, Box change Sept 2010 (occluded left subclavian venous system), Chronic renal impairment                                       | Digoxin, Bumetanide, Hydralazine, EPO, Candesartan, Bisoprolol, Sanatogen Gold, Warfarin, Simvastatin |
|         | TB12.0240   | 68          | M                            | 20/02/12   | Dilated cardiomyopathy. Normal heart (echo) 2008. Progressive breathlessness since about Nov 11. Decompensated CCF / admitted Nov 11. LVDD 64mm / EF <25% (echo) Nov 2011 and Jan12. Trivial coronary disease (angiogram) Nov 2011. Inotrope dependant. | Dopamine, Adrenaline, Furosemide, Omeprazole, Amiloride, Spironolactone, Heparin                      |
|         | TB11.0642   | 61          | M                            | 07/06/11   | Dilated Cardiomyopathy Atrial standstill Permanent pacing                                                                                                                                                                                               | Bumetanide Amiloride Candesartan Carvedilol Thyroxine Allopurinol Amiodarone                          |
|         | TB12.0754   | 43          | M                            | 31/05/12   | Dilated Cardiomyopathy                                                                                                                                                                                                                                  | Furosemide Digoxin Candesartan                                                                        |

|     |           |    |   |          |                                                                                                                                                        |                                                                                                                                                                      |
|-----|-----------|----|---|----------|--------------------------------------------------------------------------------------------------------------------------------------------------------|----------------------------------------------------------------------------------------------------------------------------------------------------------------------|
|     |           |    |   |          | Normal Coronary arteries                                                                                                                               | Carvedilol<br>Perindopril<br>Spironolactone<br>Warfarin                                                                                                              |
|     | TB11.0948 | 51 | M | 08/08/11 | Dilated Cardiomyopathy                                                                                                                                 | Other (see comments) Patient was transferred from another hospital and notes were not available to collect information.                                              |
|     | TB11.1027 | 64 | F | 25/08/11 | Dilated Cardiomyopathy                                                                                                                                 | NA                                                                                                                                                                   |
|     | TB12.1094 | 29 | M | 30/07/12 | Dilated Cardiomyopathy                                                                                                                                 | Furosemide Digoxin<br>Candesartan<br>Carvedilol<br>Perindopril<br>Spironolactone<br>Warfarin                                                                         |
|     | TB12.1222 | 54 | M | 19/08/12 | DCM; ICD Implant                                                                                                                                       | Bisoprolol;<br>Spironolactone;<br>Ramipril;<br>Bumetanide;<br>Bendroflumethiazide;<br>Warfarin                                                                       |
|     | TB11.1308 | 60 | M | 14/10/11 | Dilated Cardiomyopathy                                                                                                                                 | Docusate<br>Metoclopramide<br>Omeprazole<br>Ondansetron<br>Paracetamol<br>Amiloride Laxido<br>Amiodarone<br>Dopamine<br>Enoximone                                    |
|     | TB11.1626 | 45 | M | 06/12/11 | Dilated Cardiomyopathy                                                                                                                                 | Ramipril, Amiloride,<br>Carvedilol,<br>Bumetanide,<br>Warfarin,<br>Metolazone                                                                                        |
|     | TB11.1730 | 41 | M | 21/12/11 | Heart Failure<br>Poor ventricular function,<br>Hypotension,<br>Preserved Renal Function                                                                | Perindopril,<br>Bisoprolol,<br>Bumetanide,<br>Spironolactone                                                                                                         |
| ICM | TB12.0533 | 52 | M | 17/04/12 | ISCHEMIC HEART DISEASE;<br>Prior STEMI Nov 2009,<br>Rescue PCI,<br>Severe LV systolic dysfunction, VT with Syncope,<br>CRTD- 2009,<br>Type II Diabetes | Atorvastatin,<br>Valsartan,<br>Eplerenone, Aspirin,<br>Bisoprolol,<br>Levothyroxine,<br>Ranitidine, Heparin subcut 5000 units twice aday,<br>Furosemide,<br>Dopamine |
|     | TB12.0858 | 50 | M | 20/06/12 | NA                                                                                                                                                     | NA                                                                                                                                                                   |
|     | TB12.1144 | 45 | M | 06/08/12 | MI may 2010;                                                                                                                                           | Bumetanide;                                                                                                                                                          |

|           |    |   |          |                                                                                                                                                     |                                                                                                                                                                                                                   |
|-----------|----|---|----------|-----------------------------------------------------------------------------------------------------------------------------------------------------|-------------------------------------------------------------------------------------------------------------------------------------------------------------------------------------------------------------------|
|           |    |   |          | Heartware<br>LVAD 26/08/10;<br>ICD Medronic                                                                                                         | Amiloride;<br>Omeprazole;<br>Bisoprolol; Aspirin;<br>Candesartan;<br>Simvastatin;<br>Warfarin                                                                                                                     |
| TB12.1253 | 52 | M | 23/08/12 | ORIF # wrist<br>1983; MI 2002;<br>CABG x3 2003;<br>Bivent PPM<br>02/12/10;<br>Asthma/COPD;<br>IDDM (HbA1c<br>8.6%);<br>Artheroscopy<br>1985; Angina | Ivabradine;<br>Fluticasone;<br>Furosemide; Aspirin;<br>Atorvastatin;<br>Nicorandil;<br>Omeprazole;<br>Novomix; Sertraline;<br>NovoRapid;<br>Valsartan;<br>Carvedilol;<br>Eplerenone;<br>Tadalafil;<br>Montelukast |
| TB11.1260 | 51 | M | 06/10/11 | Ischemic Heart<br>Disease                                                                                                                           | Ramipril Furosemide<br>Omeprazole Aspirin<br>Warfarin Bisoprolol<br>Ferrous Sulphate<br>Paracetamol                                                                                                               |
| TB11.1265 | 51 | F | 10/10/11 | Ischemic Heart<br>Disease                                                                                                                           | Aspirin Ramipril<br>Bumetanide<br>Epleronone<br>Carvedilol<br>Lansoprazole<br>Candesartan Digoxin<br>Warfarin                                                                                                     |
| TB12.1375 | 60 | M | 14/09/12 | ICD in situ, Drug<br>eluting stents,<br>thrombus not on<br>warfarin as<br>increased<br>bleeding risk                                                | Amiodarone,<br>Epleronone,<br>Amiloride,<br>Lansoprazole,<br>Perindopril,<br>Atorvastatin, Ferrous<br>Sulphate, Flavonate<br>HCL, Furosemide                                                                      |
| TB11.1750 | 53 | M | 28/12/11 | NYHA III,<br>Pulmonary<br>Hypertension,<br>Non sustained<br>VT on Holter,<br>series of MI,<br>CABG 2005,                                            | Bumetanide,<br>Epleronone,<br>Ramipril, Bisoprolol,<br>Lansoprazole,<br>Prosigrel, Aspirin,<br>Simvastatin,<br>Amiodarone,<br>Nitrazepam                                                                          |
